# Supplementary material for: Optical control of nanobody-mediated protein activity modulation with a photocleavable fluorescent protein
Source: Royal Society of Chemistry journal article supplement (doi:10.1039/d4an00433g), 2024-01-01
Supplement: d4an00433g1.pdf [file d4an00433g1.pdf]

1

2

3

4

5

6

7

Supplementary Material for

8

9

## **Optical control of nanobody-mediated protein activity**

10

### **modulation with photocleavable fluorescent protein**

11

M. Endo <sup>a</sup>, S. Tomizawa <sup>a</sup>, K. Qiaoyue <sup>a</sup>, T. Ozawa <sup>a,1</sup>

12

#### **The file includes:**

14

Figure S1. Photocleavage of optoNb60 candidates.

15

Figure S2. Light-dependent interaction between  $\beta$ 2AR and optoNb60.

16

Figure S3. Investigation of inhibitory effect on ligand-induced intracellular cAMP increase by optoNb60.

17

18

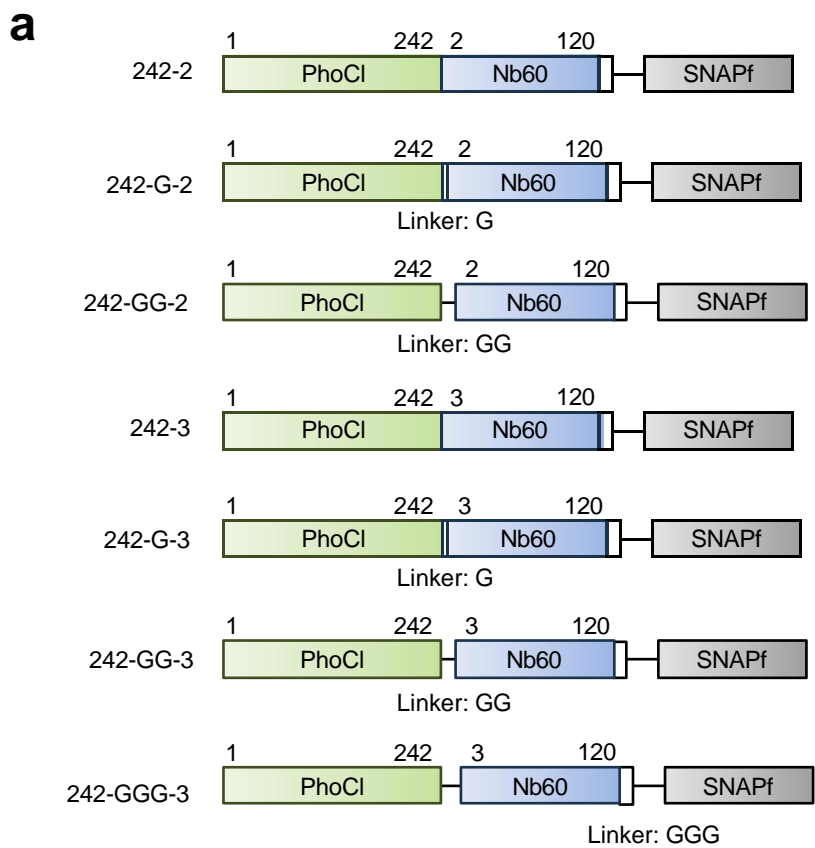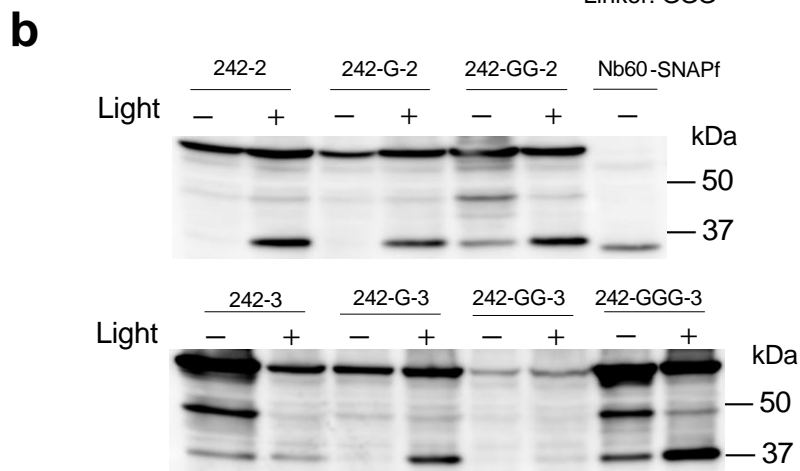

**Supplementary Figure 1.**

Photocleavage of optoNb60 candidates. (a) Box structures of the candidate molecules. (b) The photocleavage of the candidate molecules. The membrane was immunoblotted with anti-FLAG antibody.

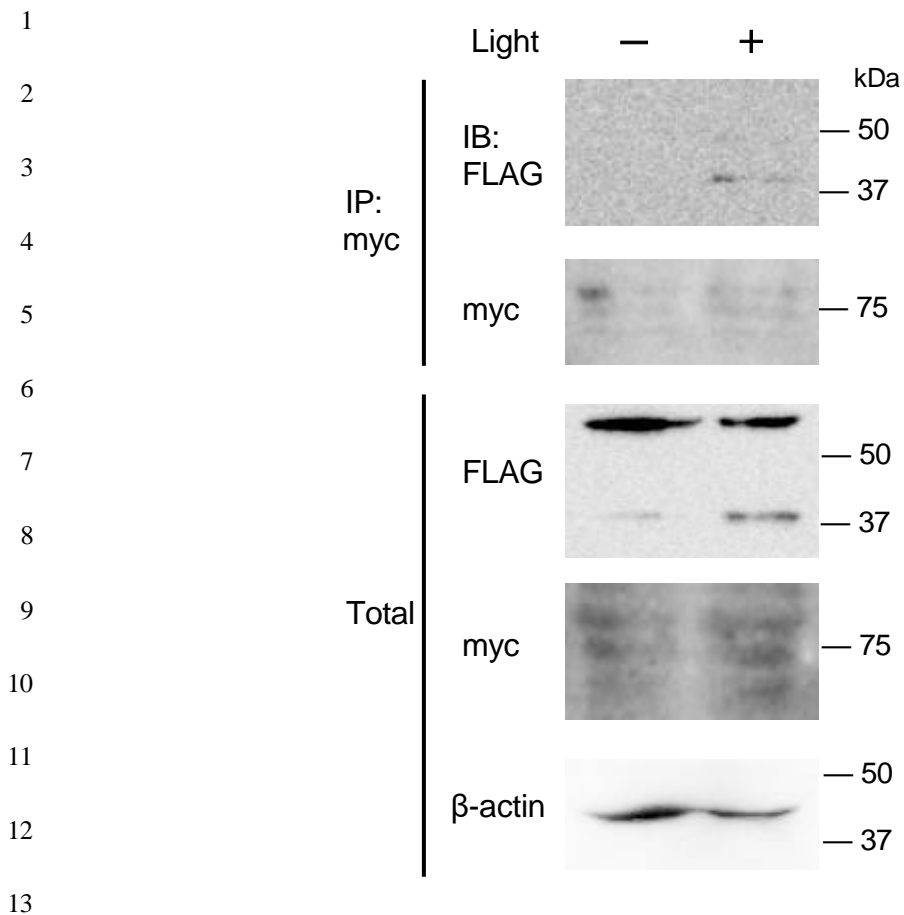

14 **Supplementary Figure 2.**

15 Light-dependent interaction between  $\beta$ 2AR and optoNb60. Cells expressing both optoNb60  
 16 and Halo- $\beta$ 2AR-myc were immunoprecipitated (IP) with anti-myc antibody. The membrane  
 17 was immunoblotted (IB) with indicated antibodies.

18

1  
2  
3  
4  
5  
6  
7  
8  
9  
10  
11  
12  
13  
14  
15  
16  
17  
18  
19  
20  
21  
22  
23  
24  
25

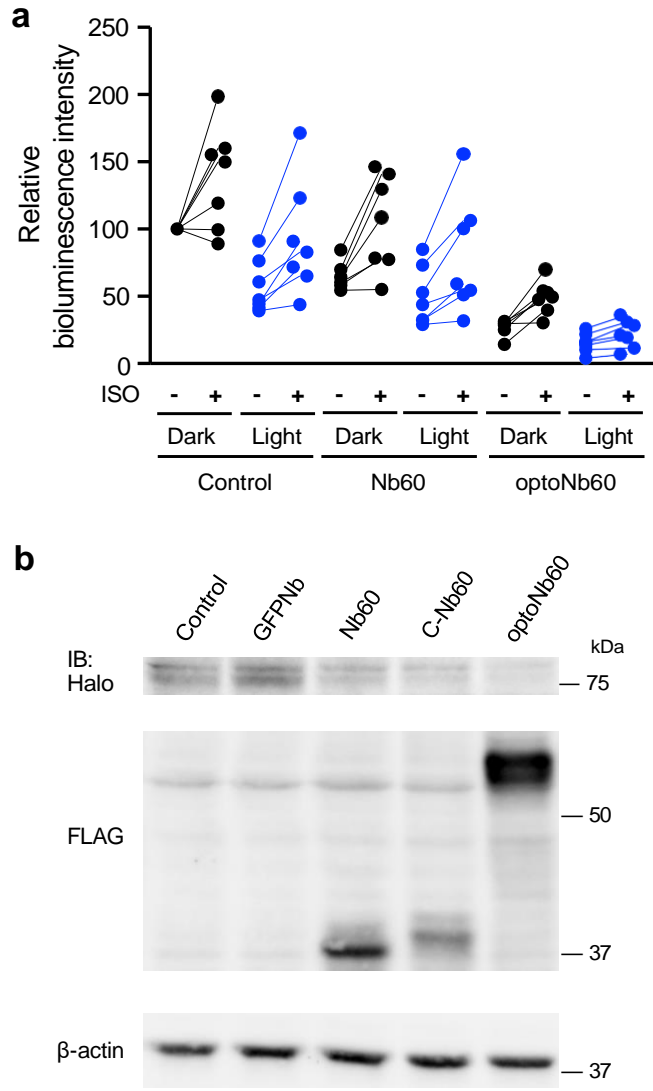

**Supplementary Figure 3.**

Investigation of inhibitory effect on ligand-induced intracellular cAMP increase by optoNb60.

(a) Ligand-induced intracellular cAMP changes. Control: no expression of any nanobodies. Each Glosensor-22F bioluminescence value was normalized to the value obtained in control cells without ligand or light stimulation in each independent experiment (n = 7). The statistical difference was analyzed by paired t-test. N.S., P > 0.05, \*P < 0.05. (b) Expression levels of Halo-β2AR and Nanobodies. The membrane was immunoblotted (IB) with indicated antibodies. C-Nb60: The C-terminal part of PhoCl (HYGNRVFTKYPR) was added to the N-terminus of optoNb60.
